# Supplementary material for: Reduced basal forebrain atrophy progression in a randomized Donepezil trial in prodromal Alzheimer’s disease
Source: PubMed Central journal article supplement (PMC5601919; doi:10.1038/s41598-017-09780-3), 2017-09-15

# Reduced basal forebrain atrophy progression in a randomized Donepezil trial in prodromal Alzheimer's disease

Enrica Cavedo, Michel J. Grothe, Olivier Colliot, Simone Lista, Marie Chupin, Didier Dormont, Marion Houot, Stephane Lehericy, Stefan Teipel, Bruno Dubois, Harald Hampel and the "Hippocampus Study Group"\*\*\*

**Supplementary Figure 1. Scatter plots describing the distribution of Grey Matter and Basal Forebrain Cholinergic System volumes in each treatment group stratified by MRI field strength at baseline and follow-up scans.**

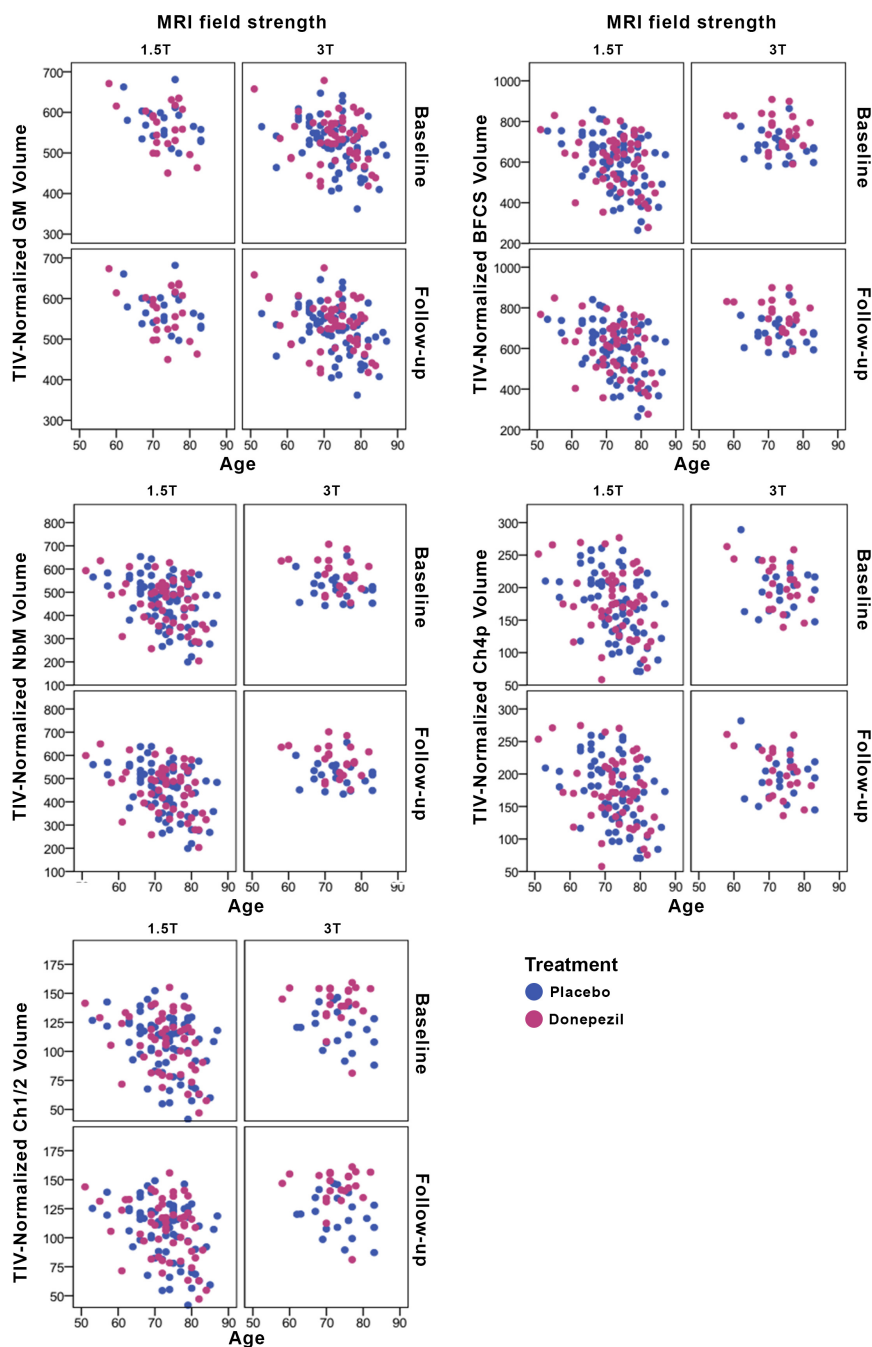

Supplement: 41598_2017_9780_MOESM1_ESM.pdf [file 41598_2017_9780_MOESM1_ESM.pdf]
